# Supplementary material
Source: publisher figshare collection journal article supplement (https://tandf.figshare.com/ndownloader/files/19270214)
Supplement: Supplementary file 1 [file 19270214]

Supplemental Table 1. Risk factors for IgAN-AS by binary multivariate regression analysis.

|  | HR | 95%CI | P |
| --- | --- | --- | --- |
| Model 1 | | | |
| C-reactive protein | -- | -- | ns |
| IgA > 2.86g/l | -- | -- | ns |
| IgG > 9.72g/l | 6.144 | 1.240-30.445 | < 0.05 |
| C3 | 23.906 | 1.818-314.38 | < 0.05 |
| CD3+ T cell counts | -- | -- | ns |
| CD8+ T cell counts | 1.005 | 1.001-1.009 | < 0.05 |
| Model 2 | | | |
| Prednisone equivalent > 7.5mg/d | -- | -- | ns |
| C-reactive protein | -- | -- | ns |
| IgA > 2.86g/l | -- | -- | ns |
| IgG > 9.72g/l | 7.117 | 1.311-38.632 | < 0.05 |
| C3 | 45.379 | 2.737-752.49 | < 0.05 |
| CD3+ T cell counts | -- | -- | ns |
| CD8+ T cell counts | 1.005 | 1.001-1.009 | < 0.05 |

IgA: immunoglobulin A; IgG: immunoglobulin G; GC: glucocorticoid; Receiver operating characteristic (ROC) curve was drawn for IgA and IgG to determine the optimal cut-off values to predict IgAN-AS.

Model 1. Parameters such as CRP, IgA > 2.86g/l, IgG > 9.72g/l, C3, CD3+ T cell and CD8+ T cell counts were considered into a binary multivariate logistic regression model 1.

Model 2. Parameters in model 1, such as CRP, IgA > 2.86g/l, IgG > 9.72g/l, C3, CD3+ T cell and CD8+ T cell counts, and GC dose > 7.5mg/d were considered into a binary multivariate logistic regression model 2.

Supplemental Table 2. Risk factors for HLA-B27 positivity in patients with SIgAN-AS by binary multivariate regression analysis.

|  | HR | 95%CI | P |
| --- | --- | --- | --- |
| Model 3 | | | |
| C-reactive protein | -- | -- | ns |
| C3 > 0.996g/l | 8.418 | 1.611-43.992 | 0.012 |
| IgM > 1.125g/l | 7.35 | 1.153-46.84 | 0.035 |
| IgA > 4.33g/l | -- | -- | ns |
| IgG > 11.7g/l | -- | -- | ns |
| Model 4 | | | |
| Prednisone equivalent > 7.5mg/d | -- | -- | ns |
| C-reactive protein | -- | -- | ns |
| C3 > 0.996g/l | 8.418 | 1.611-43.992 | 0.012 |
| IgM > 1.125g/l | 7.35 | 1.153-46.84 | 0.035 |
| IgA > 4.33g/l | -- | -- | ns |
| IgG > 11.7g/l | -- | -- | ns |

C3: complement 3; IgM/A/G: immunoglobulin M/A/G;

Receiver operating characteristic (ROC) curve was drawn for C3, IgM, IgA and IgA to determine the optimal cut-off values to predict HLA-B27 positivity in patients with IgAN-AS.

Model 3. Parameters such as CRP, C3 > 0.996g/l, IgM > 1.125g/l, IgA > 4.33g/l and IgG > 11.7g/l were considered into a binary multivariate logistic regression model 3.

Model 4. Parameters in model 3, such as CRP, C3 > 0.996g/l, IgM > 1.125g/l, IgA > 4.33g/l, IgG > 11.7g/l, and GC dose > 7.5mg/d were considered into a binary multivariate logistic regression model 4.
